# Supplementary material
Source: Springer Nature journal article supplement (https://www.springermedizin.de/resource/supplementary/12889_2014_6989_MOESM5_ESM.pdf/9499522)
Supplement: MOESM5 [file 9499522]

### Community resources

- Using the *Oportunidades* volunteers in the health centre.
- Using the vaccination brigades to inform.
- Using the health centre spokespeople  
Collective community campaigns.

### Word of Mouth

- Informing pupils in school so that they inform their parents.
- Those who have received the screens informing their neighbours.

## Information Sharing

### Project driven

- Leaflets
- Community meetings
- Having a telephone number to contact for information
- Putting posters up in the neighbourhood
- Having a 'show house' to display the screens

### Media

- Television
- Radio
- Newspaper
